# Supplementary material for: Impact of Medication Regimen Simplification on Medication Incidents in Residential Aged Care: SIMPLER Randomized Controlled Trial
Source: MDPI journal article supplement (doi:10.3390/jcm10051104), 2021-03-06
Supplement: s1 [file s1]

**Table S1.** Severity assessment code (SAC) matrix used to classify medication incidents at the participating residential aged care facilities.

|                   |          | <i>Consequence</i> |       |          |       |         |
|-------------------|----------|--------------------|-------|----------|-------|---------|
|                   |          | Severe             | Major | Moderate | Minor | Minimal |
| <i>Likelihood</i> | Frequent | 1                  | 1     | 2        | 3     | 3       |
|                   | Likely   | 1                  | 1     | 2        | 3     | 3       |
|                   | Possible | 1                  | 2     | 2        | 3     | 4       |
|                   | Unlikely | 1                  | 2     | 3        | 4     | 4       |
|                   | Rare     | 2                  | 3     | 3        | 4     | 4       |

**Table S2.** Medications implicated in incidents by WHO† Anatomical Therapeutic Chemical (ATC) code.

| Code | Drug group                                              | Intervention group | Comparison group | Total cohort incidents |
|------|---------------------------------------------------------|--------------------|------------------|------------------------|
| A    | Alimentary tract, not spec.                             | 0                  | 1                | 1                      |
| A02B | Drugs for peptic ulcer/gastro-esophageal reflux disease | 2                  | 1                | 3                      |
| A06A | Drugs for constipation                                  | 1                  | 2                | 3                      |
| A10A | Insulins and analogues                                  | 3                  | 2                | 5                      |
| A10B | Blood glucose lowering, excluding insulin               | 1                  | 0                | 1                      |
| A11  | Vitamins, not spec.                                     | 1                  | 0                | 1                      |
| A12A | Calcium supplements                                     | 1                  | 1                | 2                      |
| B01A | Antithrombotic agents                                   | 6                  | 5                | 11                     |
| B03B | Vitamin B <sub>12</sub> and/or folic acid               | 0                  | 1                | 1                      |
| C01D | Vasodilators, for cardiac disease                       | 7                  | 0                | 7                      |
| C02C | Anti-adrenergic agents, peripheral acting               | 2                  | 0                | 2                      |
| C03C | High-ceiling diuretics                                  | 1                  | 0                | 1                      |
| C03D | Potassium sparing diuretics                             | 1                  | 0                | 1                      |
| C07A | Beta-blocking agents                                    | 1                  | 0                | 1                      |
| C08C | Selective calcium channel blockers                      | 1                  | 0                | 1                      |
| C09C | Angiotensin II receptor blockers                        | 0                  | 1                | 1                      |
| D    | Dermatological, not spec.                               | 1                  | 0                | 1                      |
| H02A | Corticosteroids for systemic use                        | 0                  | 1                | 1                      |
| J01  | Anti-bacterial for systemic use                         | 2                  | 1                | 3                      |
| M01A | Anti-inflammatory and anti-rheumatic                    | 1                  | 1                | 2                      |
| M03B | Centrally acting muscle relaxants                       | 0                  | 1                | 1                      |
| M04A | Anti-gout preparations                                  | 1                  | 0                | 1                      |
| N02  | Analgesics, not spec.                                   | 0                  | 5                | 5                      |
| N02A | Opioids                                                 | 3                  | 0                | 3                      |
| N02B | Other analgesics or antipyretics                        | 8                  | 3                | 11                     |
| N03A | Anti-epileptics                                         | 1                  | 0                | 1                      |
| N04  | Anti-Parkinson's, not spec.                             | 0                  | 1                | 1                      |
| N04B | Dopaminergic agents                                     | 0                  | 1                | 1                      |
| N05A | Antipsychotics                                          | 1                  | 1                | 2                      |
| N05B | Anxiolytics                                             | 2                  | 2                | 4                      |
| N06A | Antidepressants                                         | 1                  | 1                | 2                      |
| N06D | Anti-dementia drugs                                     | 0                  | 1                | 1                      |
| R06A | Antihistamines for systemic use                         | 0                  | 1                | 1                      |
| S01  | Ophthalmological, not spec.                             | 1                  | 0                | 1                      |

†WHO: World Health Organization
